# Supplementary material for: The preparation route and final form of V-MXenes override the effect of the O/F ratio on their magnetic properties
Source: Royal Society of Chemistry journal article supplement (doi:10.1039/d4tc00132j), 2024-01-01
Supplement: d4tc00132j1.pdf [file d4tc00132j1.pdf]

## Supporting Information

### The preparation route and final form of V-MXenes override the effect of the O/F ratio on their magnetic properties

Pavla Eliášová<sup>a\*</sup>, Břetislav Šmíd<sup>b</sup>, Jana Vejpravová<sup>b</sup>, Shuo Li<sup>a</sup>, Federico Brivio<sup>a</sup>, Michal Mazur<sup>a</sup>, Daniel N. Rainer<sup>a</sup>, M. Infas H. Mohideen<sup>a</sup>, Russell E. Morris<sup>c</sup>, Petr Nachtigall<sup>a</sup>

#### Computational methods

All calculations were performed at the density functional theory (DFT) level using the Vienna “*ab-initio*” simulation package (VASP)<sup>1,2</sup> and the Perdew–Burke–Ernzerhof (PBE) exchange–correlation functional<sup>3</sup>. The semi-empirical DFT-D3 method<sup>4</sup> was used to treat van der Waals interactions. Furthermore, the DFT+U method<sup>5</sup> was applied to assess the correct magnetic order of strongly correlated systems containing transition metals. A Hubbard correction of  $U = 3$  eV was employed based on our previous study.<sup>6</sup> The Brillouin zone was represented by a special Monkhorst–Pack k-point mesh of  $21 \times 21 \times 7$ ,  $21 \times 21 \times 1$ ,  $11 \times 11 \times 1$  and  $5 \times 5 \times 1$  points for geometric and electronic structures of the MAX phase and unit cell,  $(2 \times 2)$  supercell, and  $(3 \times 3)$  supercell of MXenes, respectively. An energy cut-off of 500 eV was used to determine the self-consistent charge density for the plane wave basis sets. The structures were fully optimized until the maximum Hellmann–Feynman force on atoms was lower than  $0.01$  eV  $\text{\AA}^{-1}$  and the total energy variation was lower than  $1.0 \times 10^{-5}$  eV. A vacuum ( $> 12$   $\text{\AA}$ ) was added in the direction perpendicular to the slab to model the isolated monolayers.

To evaluate the stability of functionalized  $V_2CO_xF_{2-x}$  ( $0 \leq x \leq 2$ ) MXenes, the formation energy ( $E_{form}$ ) of the unit cell was calculated according to the following equation:

$$E_{form} = (E[V_2CO_xF_{2-x}] - E[V_2C] - \frac{x}{2}E[O_2] - \frac{2-x}{2}E[F_2])/2n \quad (S1)$$

where  $E[V_2C]$  and  $E[V_2CO_xF_{2-x}]$  stand for the total energies of pristine  $V_2C$  and functionalized  $V_2CO_xF_{2-x}$  MXenes, respectively,  $E[O_2]$  and  $E[F_2]$  is the energy of  $O_2$  and  $F_2$  molecules in the gas phase, respectively, and  $n$  represents the  $(n \times n)$  supercell.

We used a scalar, collinear magnetic model, and we considered the ferromagnetic (FM) configuration and possible antiferromagnetic (AFM) states to calculate the preferred magnetic ground state structures of related MXenes (Figure S13). Assessing the full magnetic properties of these materials requires using a larger simulation scale that can be approached using the Ising model and to map the energy landscape to an effective classical spin Hamiltonian on a honeycomb lattice according to the following equation:

$$H_{spin} = \frac{1}{2} \sum_{i \neq j} J_{ij} S_i \cdot S_j$$

where  $S_i$  is the total spin magnetic moment of the atomic site  $i$ ,  $J_{ij}$  are the exchange coupling parameters between two local spins, and the prefactor  $1/2$  accounts for the double counting of spin. We can extract the nearest-neighbor ( $J_1$ ), second-nearest-neighbor ( $J_2$ ), and third-nearest-neighbor ( $J_3$ ) coupling constants from DFT calculations (for  $(2 \times 2)$   $V_2CO_xF_{2-x}$  MXenes):

$$E_{AFM1} - E_{FM} = (3J_1 + 3J_3)S^2$$

$$E_{AFM3} - E_{AFM2} = (J_1 - 3J_3)S^2$$

$$E_{AFM2} - E_{AFM1} = (4J_2 - 2J_1)S^2$$

This approach enabled us to calculate the Curie temperature through Monte Carlo simulations performed with the open source software ALPS.<sup>7</sup>

### **Preparation of multilayered and delaminated $V_2AlC$ films**

Materials prepared by etching parent  $V_2AlC$  are denoted as multilayered  $V_2CT_x$  with an *ml-* $V_2CT_x$  prefix. When using a mixture of concentrated acids (CA) HF (29M) and HCl (12M) for etching, we denote the sample with an additional prefix *CA*, i.e. *CA-ml- $V_2CT_x$* . Similarly, when using a mixture with diluted (DA) HCl acid (6M) and concentrated HF (29M), we denote the materials with the prefix *DA*, i.e. *DA-ml- $V_2CT_x$* .

### **Etching of the $V_2AlC$ MAX phase**

As shown in Figure S8, the PXRD pattern of  $V_2AlC$  powder (SEM image in Figure S10 mostly corresponds to the MAX phase with a (002) peak position at  $13.5^\circ 2\theta$ <sup>8</sup>. In addition to this MAX phase,  $V_2AlC$  powder also contains other phases, such as vanadium oxides and aluminium oxide, as shown in the PXRD pattern (Figure S8). These phases can be formed during MAX phase synthesis. Their presence in minor fractions is usually not an issue as they can be dissolved during the etching treatment or separated during the delamination process.

Some authors have investigated suitable conditions for  $V_2AlC$  etching by comparing concentrated HF at RT for 72 hours with a mixture of concentrated HF + HCl at 50 °C for 72 hours<sup>9</sup>. Under both conditions, multilayered  $V_2CT_x$  was formed, also containing an unreacted parent phase, but the treatment with a mixture of concentrated acids provided a higher yield. Similar conditions (concentrated HF + HCl at 40 °C for 48 hours) were used in the latest paper to report a new synthetic approach for MXenes, more specifically  $V_2AlC$ <sup>10</sup>. In both studies, their parent MAX phase was prepared in their laboratory. By contrast, in this study, the MAX phase was purchased from a commercial vendor. Nevertheless, we started our experiments by reproducing their method, using a mixture of concentrated HF (29M) and HCl (12M) acids at 50 °C.

Following the recommended safety procedures, we slowly added  $V_2AlC$  into a concentrated acid mixture, which was cooled in an ice bath. Despite our efforts, the procedure was not particularly

reproducible, though, as shown in Figure S9. The experiments in concentrated acids at 50 °C yielded different multilayered  $V_2CT_x$  MXenes, as evidenced by the different positions of the (002) peak. In one case, transferring the reaction bottle into an oil bath preheated to 50 °C even triggered an exothermic reaction, which released large bubbles of hydrogen, quickly turned the suspension green and even heated up the oil bath above 50° C. This reaction was stopped by cooling down in an ice bath. The PXRD pattern highlighted that the parent MAX phase was completely dissolved, leaving only  $Al_2O_3$  and a mixture of vanadium oxides, as shown in Figure S9.

Based on these experiences, we continued the etching tests at room temperature to avoid unpredictable, exothermic reactions, thus developing a more reproducible method. Still, in most etching experiments with a concentrated acid mixture, we observed the formation of aluminium oxide. Even when the  $V_2AlC$  phase was meshed to the same particle size, as previously reported<sup>9</sup> (see SEM images in Figure S10), the quality of the starting material obviously varied, and therefore so did the etching conditions. But when diluting HCl to half (6M solution), we consistently obtained multilayered  $V_2CT_x$  with only a negligible or no fraction of  $Al_2O_3$  and with a smaller portion of the unreacted MAX phase than with the concentrated acid mixture. In conclusion, the most efficient and reproducible etching conditions consist of applying a mixture of 29 M HF + 6M HCl to our commercially purchased  $V_2AlC$  MAX phase at room temperature for 72 hours.

#### **Exfoliation of multilayered $V_2CT_x$**

To exfoliate the layers, a freshly etched multilayered  $V_2CT_x$  (wet powder) was directly intercalated with a 25% tetramethylammonium hydroxide solution. Subsequent series of centrifugation and mechanical shaking yielded a black supernatant of exfoliated  $V_2CT_x$  layers. The exfoliated layers were had a bronze hue. To demonstrate the reproducibility of etching in a diluted acid solution, we prepared delaminated  $V_2CT_x$ , more specifically *DA-del- $V_2CT_x$  (1)* and *DA-del- $V_2CT_x$  (2)*, in two experiments to compare their properties. In their PXRD patterns (2), all films have the same profile with similar intensities, and the (002) peak has the same position at  $6.9^\circ 2\theta$  (corresponding to d-spacing 1.28 nm). Only *DA-del- $V_2CT_x$  (1)* shows low intensity peaks of the parent MAX phase, indicating a minor fraction of unreacted  $V_2AlC$ .

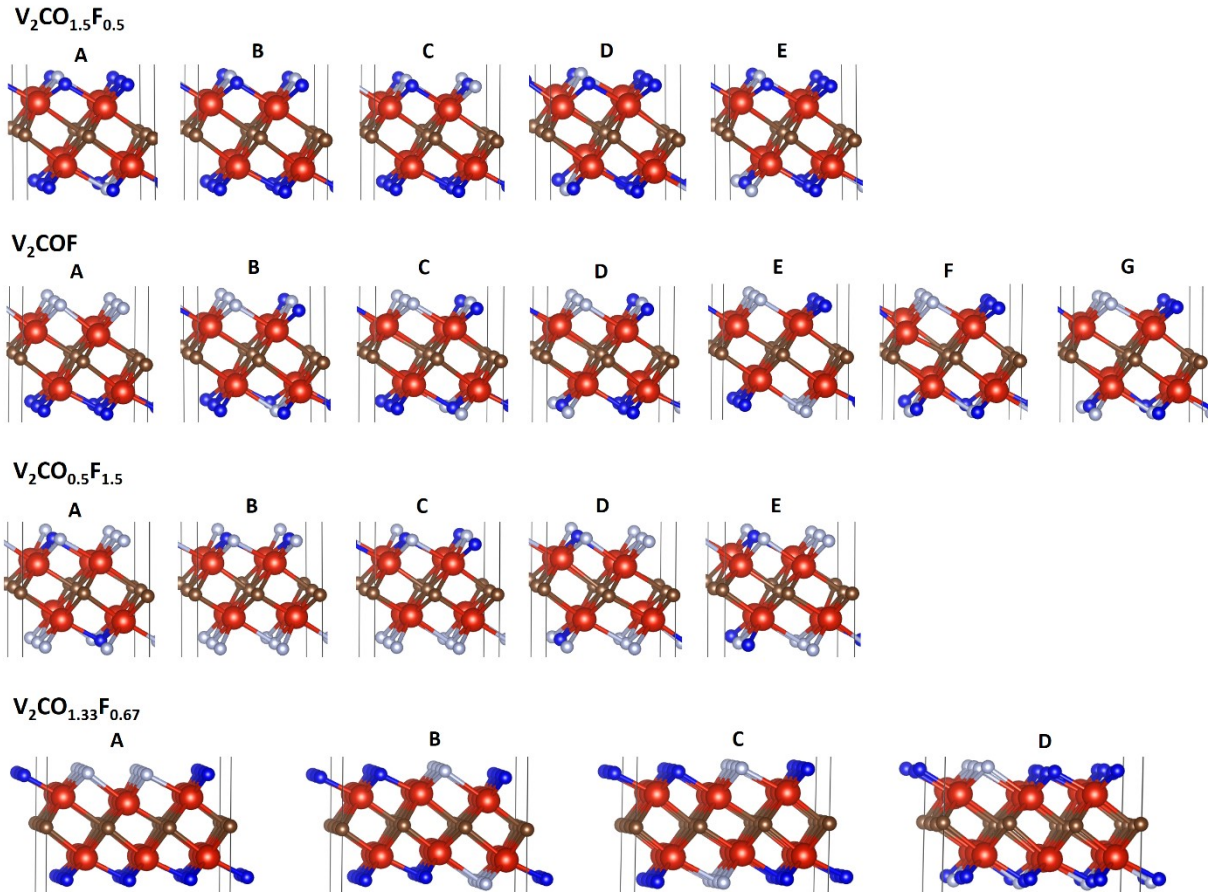

Fig.S1 The possible structures of  $V_2CO_xF_{2-x}$  at different concentrations of  $x = 1.5, 1.0$  and  $0.5$  in  $(2 \times 2)$  supercell and  $x = 1.33$  in  $(3 \times 3)$  supercell. Red, brown, blue and gray balls represent V, C, O and F atoms.

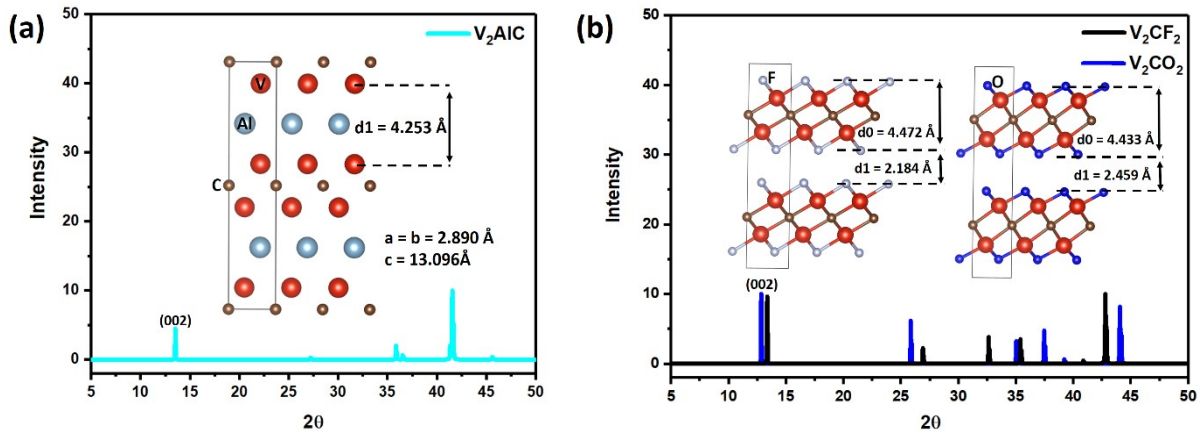

Fig.S2 Simulated PXR of (a) the vanadium MAX phase and (b) stacking of  $V_2CO_2$  and  $V_2CF_2$  layers. The corresponding structures are shown in the insets.  $d_0$  and  $d_1$  stand for the thickness of the layer and the interlayer distance, respectively. Red, light blue, brown, blue and gray balls represent V, Al, C, O and F atoms.

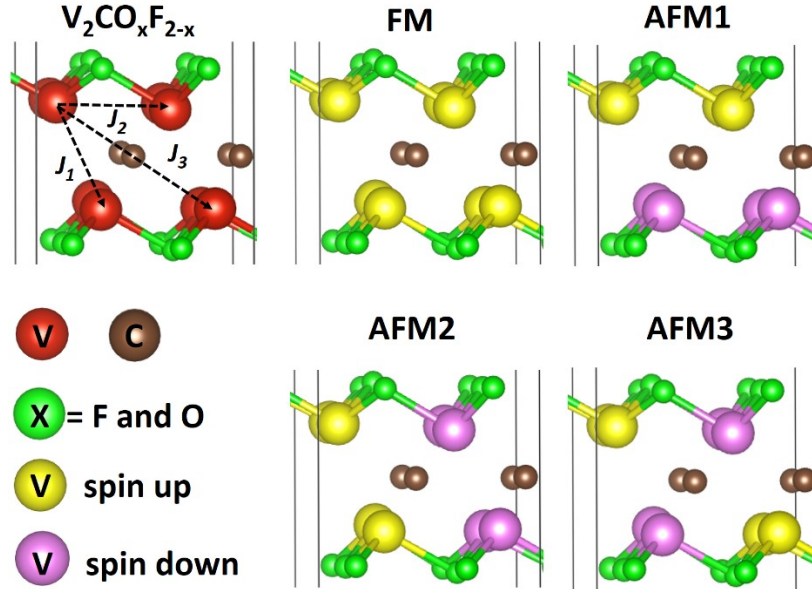

Fig.S3 Possible magnetic configurations of the  $V_2CO_xF_{2-x}$  MXene and spin exchange parameters. Yellow and pink balls represent V atoms with spin up and spin down electron configurations.

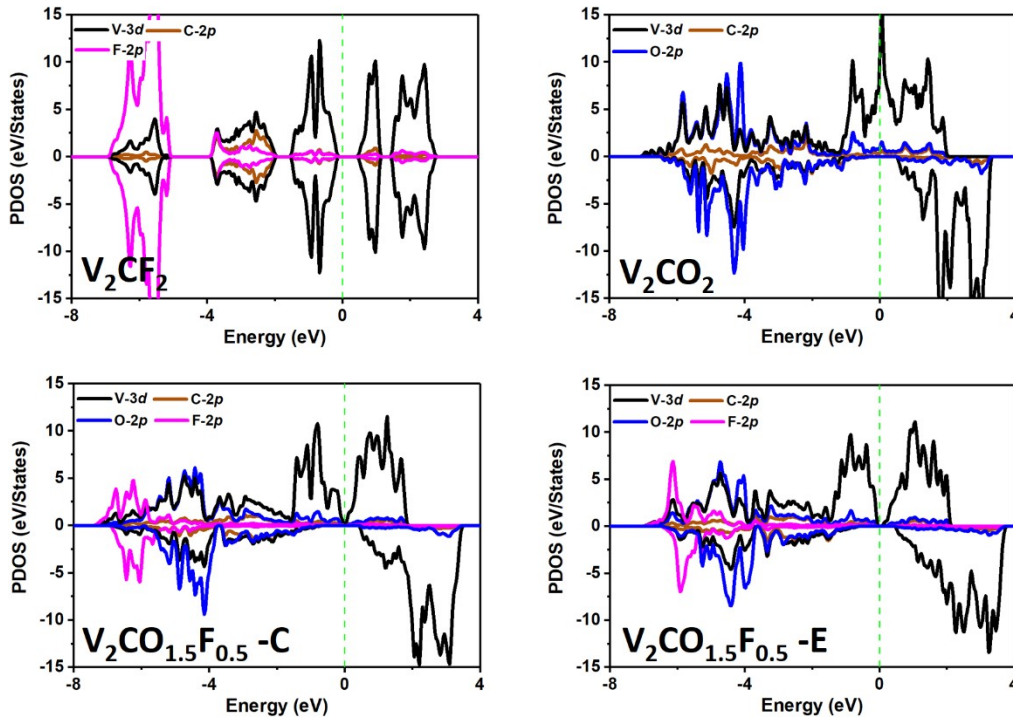

Fig.S4 Partial density of states (PDOS) of V-3d states and C, O and F-2p states for  $V_2CF_2$ ,  $V_2CO_2$  and  $V_2CO_xF_{2-x}-X$  MXenes in  $(2 \times 2)$  supercell. -X stands for the specific configuration of the surface functional group, as defined in Fig. S1.

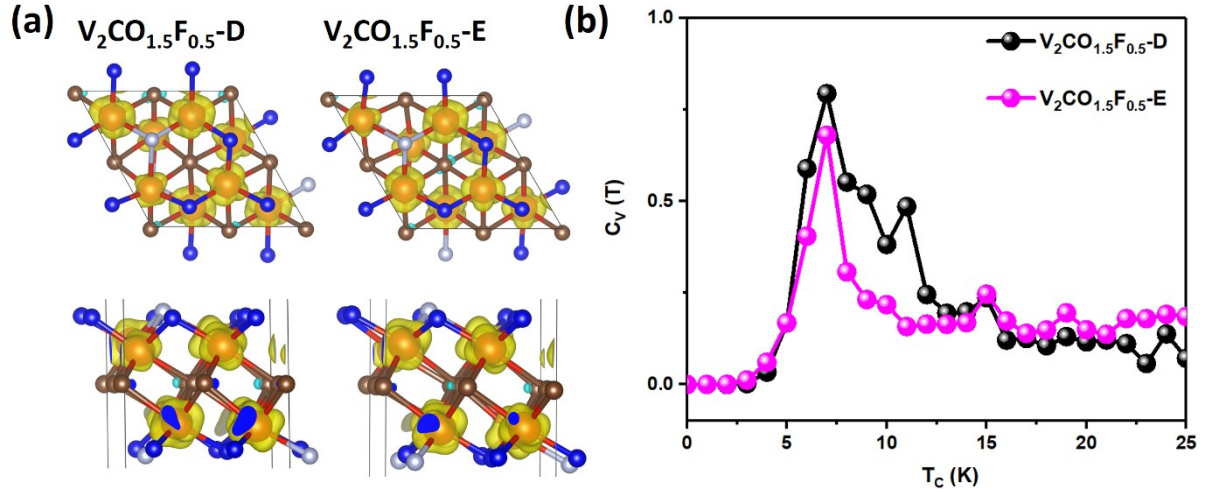

Fig.S5 (a) Spin-charge-polarized densities (SCD) and (b) simulated specific heat ( $C_V$ ) as a function of temperature ( $T_C$ ) for  $V_2CO_{1.5}F_{0.5}$ -D and  $V_2CO_{1.5}F_{0.5}$ -E. The isosurface of SCD is  $0.03 e/\text{Bohr}^3$ . Red, brown, blue and gray balls represent V, C, O and F atoms.

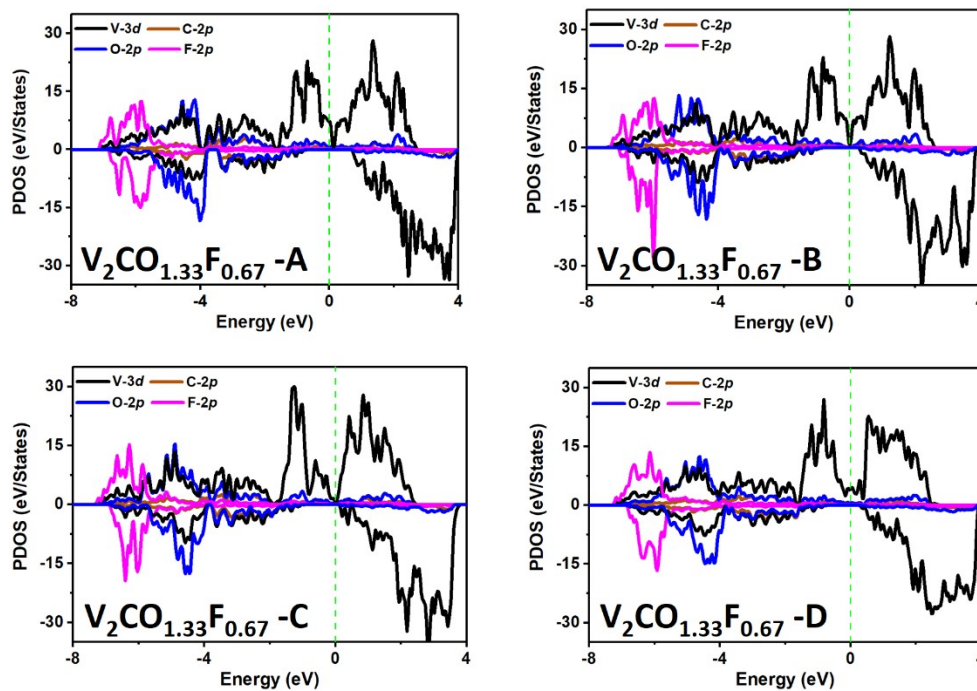

Fig.S6 Partial density of states (PDOS) of V-3d states and C, O and F-2p states for  $V_2CO_{1.33}F_{0.67}$ -X MXenes in  $(3 \times 3)$  supercell. -X stands for the specific configuration of the surface functional group, as defined in Fig. S1.

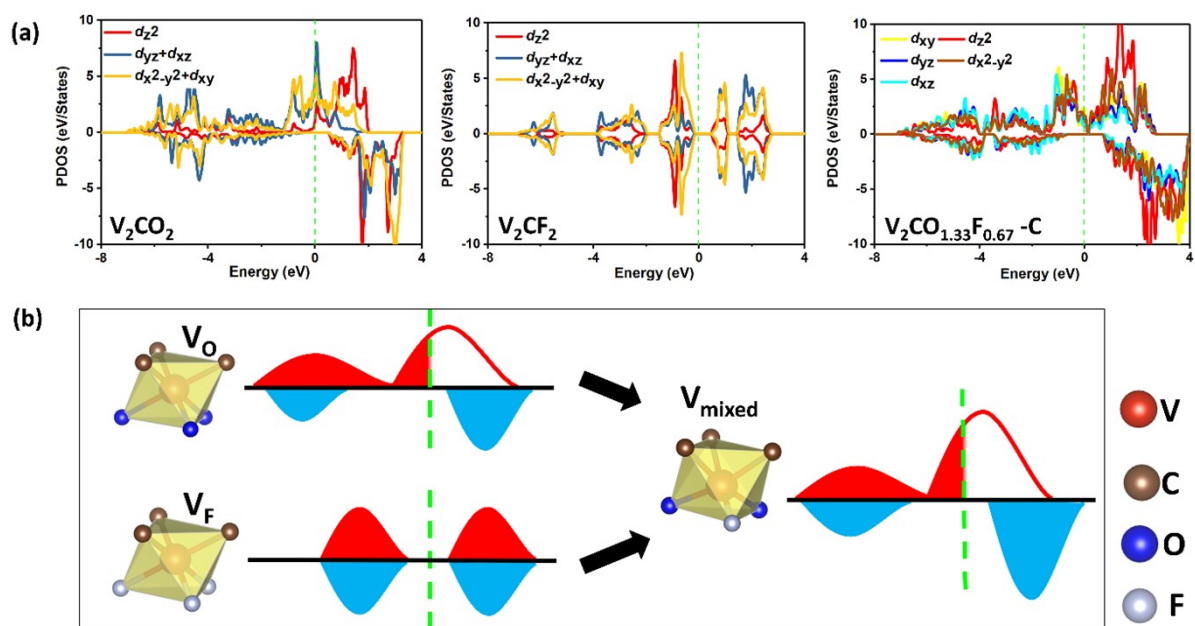

Fig.S7 (a) PDOS of V-3d orbitals of  $V_2CO_2$ ,  $V_2CF_2$  and  $V_2CO_{1.33}F_{0.67}-A$  MXenes. (b) Schematic diagrams of the V spin polarizations in symmetrically and asymmetrically functionalized surfaces.  $V_{mixed}$  represents the V atom in  $V_2CO_{1.33}F_{0.67}$  MXenes.

Table S1 Calculated geometric parameters and electronic and magnetic properties.  $L$  is the lattice constant (in Å),  $E_{form}$  is the formation energy (in eV) of the unit cell,  $M$  is the average value of the magnetic moment of V atoms (in  $\mu_B$ ),  $Q$  is the average value of the charge of V atoms (in  $e$ ) assessed by Bader charge analysis, G.S. is the magnetic ground state, and  $T_C/T_N$  is the Curie/Néel temperature (in K).

| MXenes                 |   | $L$  | $E_{form}$ | $M$  | $Q$   | G.S. | $T_C/T_N$ |
|------------------------|---|------|------------|------|-------|------|-----------|
| $V_2CO_2$              |   | 2.95 | -4.13      | 1.12 | -2.15 | FM   | 12        |
| $V_2CF_2$              |   | 3.16 | -4.89      | 2.10 | -1.93 | AFM2 | 38        |
| $V_2CO_{1.5}F_{0.5}$   | A | 3.03 | -4.42      | 1.44 | -2.09 | FM   | 34        |
|                        | B | 3.04 | -4.42      | 1.39 | -2.11 | FM   | 32        |
|                        | C | 3.04 | -4.42      | 1.39 | -2.11 | FM   | 48        |
|                        | D | 2.99 | -4.45      | 1.39 | -2.09 | FM   | 7         |
|                        | E | 3.03 | -4.45      | 1.39 | -2.09 | FM   | 7         |
| $V_2COF$               | A | 3.09 | -4.60      | 1.61 | -2.05 | FM   | 48        |
|                        | B | 3.06 | -4.62      | 1.51 | -2.04 | AFM2 | 40        |
|                        | C | 3.08 | -4.61      | 1.64 | -2.04 | FM   | 44        |
|                        | D | 3.10 | -4.63      | 1.62 | -2.06 | FM   | 9         |
|                        | E | 3.08 | -4.60      | 1.64 | -2.04 | FM   | 15        |
|                        | F | 3.08 | -4.62      | 1.63 | -2.05 | FM   | 25        |
|                        | G | 3.06 | -4.62      | 1.52 | -2.04 | AFM2 | 10        |
| $V_2CO_{0.5}F_{1.5}$   | A | 3.13 | -4.77      | 1.75 | -2.00 | AFM3 | 20        |
|                        | B | 3.09 | -4.80      | 1.84 | -1.98 | FM   | 19        |
|                        | C | 3.13 | -4.79      | 1.76 | -1.99 | AFM3 | 22        |
|                        | D | 3.10 | -4.82      | 1.70 | -2.00 | AFM2 | 24        |
|                        | E | 3.14 | -4.84      | 1.74 | -2.00 | AFM2 | 33        |
| $V_2CO_{1.33}F_{0.67}$ | A | 2.99 | -4.48      | 1.48 | -2.09 | FM   | /         |
|                        | B | 2.99 | -4.49      | 1.48 | -2.08 | FM   | /         |
|                        | C | 2.98 | -4.52      | 1.47 | -2.10 | FM   | /         |
|                        | D | 3.02 | -4.50      | 1.48 | -2.08 | FM   | /         |



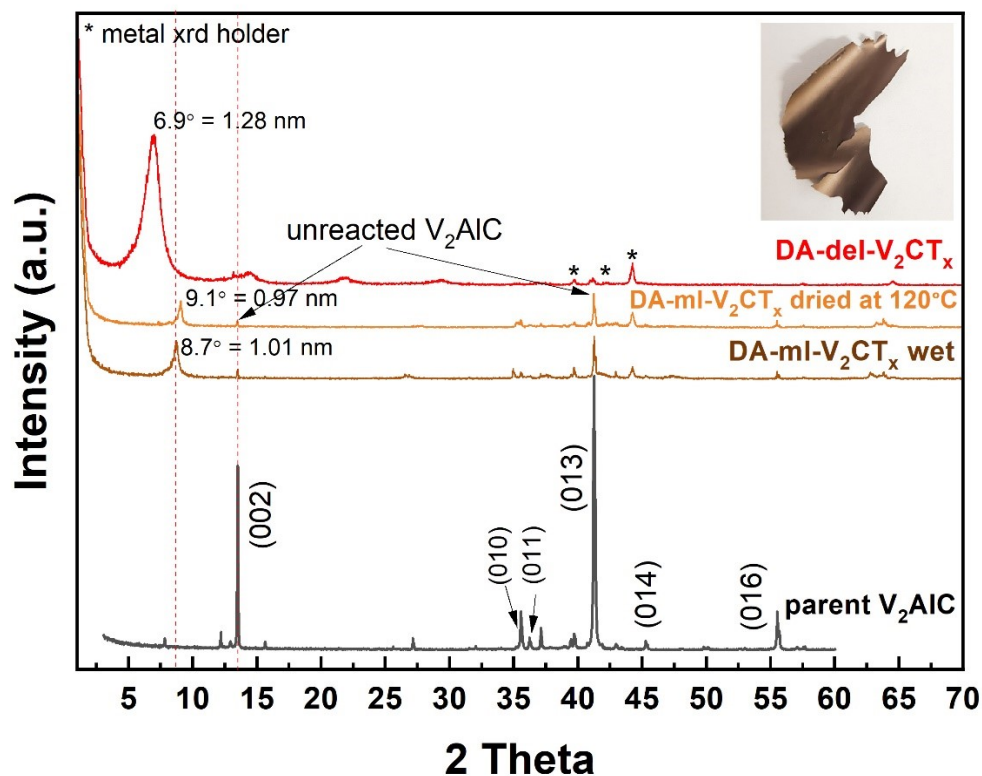

Fig.S8 X-ray powder (PXRD) pattern of the parent  $V_2AlC$  MAX phase and daughter MXenes after etching in diluted acid solution,  $DA-ml-V_2CT_x$  (1). The multilayered  $DA-ml-V_2CT_x$  (1) was measured directly after etching (designated as wet) and after drying at  $120^\circ C$ . After exfoliation and filtration of the colloidal suspension, the material is designated as  $DA-del-V_2CT_x$  (1). Additional peaks labeled with an asterisk are assigned to the metal XRD sample holder. The optical image of the shiny thin film of  $DA-del-V_2CT_x$  (1) is shown on the right upper corner.

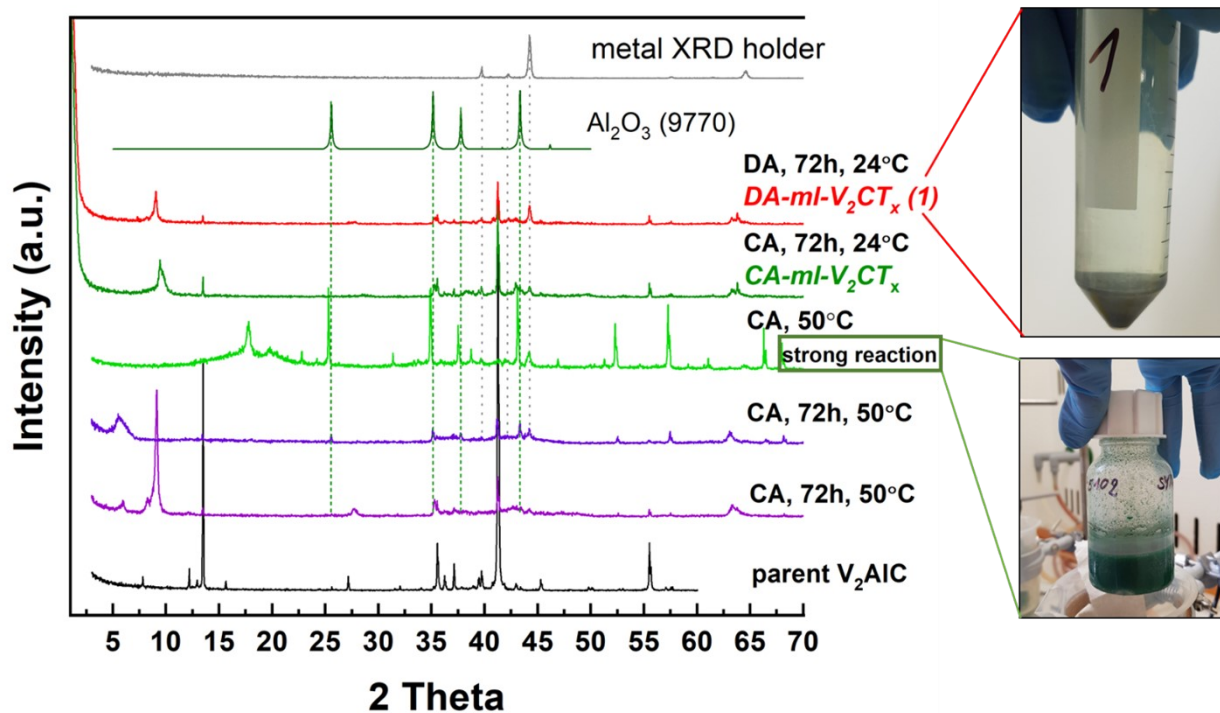

Fig.S9 Comparison of powder XRD patterns of the parent V<sub>2</sub>AlC and daughter MXene materials prepared under different etching conditions. In some cases, the reflections of the metal XRD holders (stainless steel) are visible in the diffractograms of the materials. Photographs of the resulting etching solution are shown for two set of conditions – after the very strong, exothermic reaction and after the controlled reactions under milder conditions.

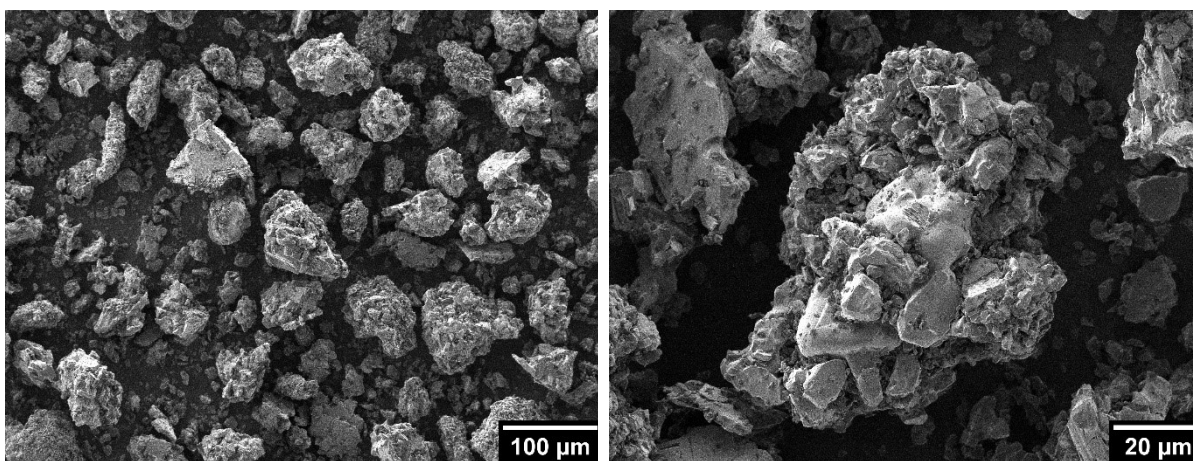

Fig.S10 Scanning electron microscopy images of a parent  $V_2AlC$  material.

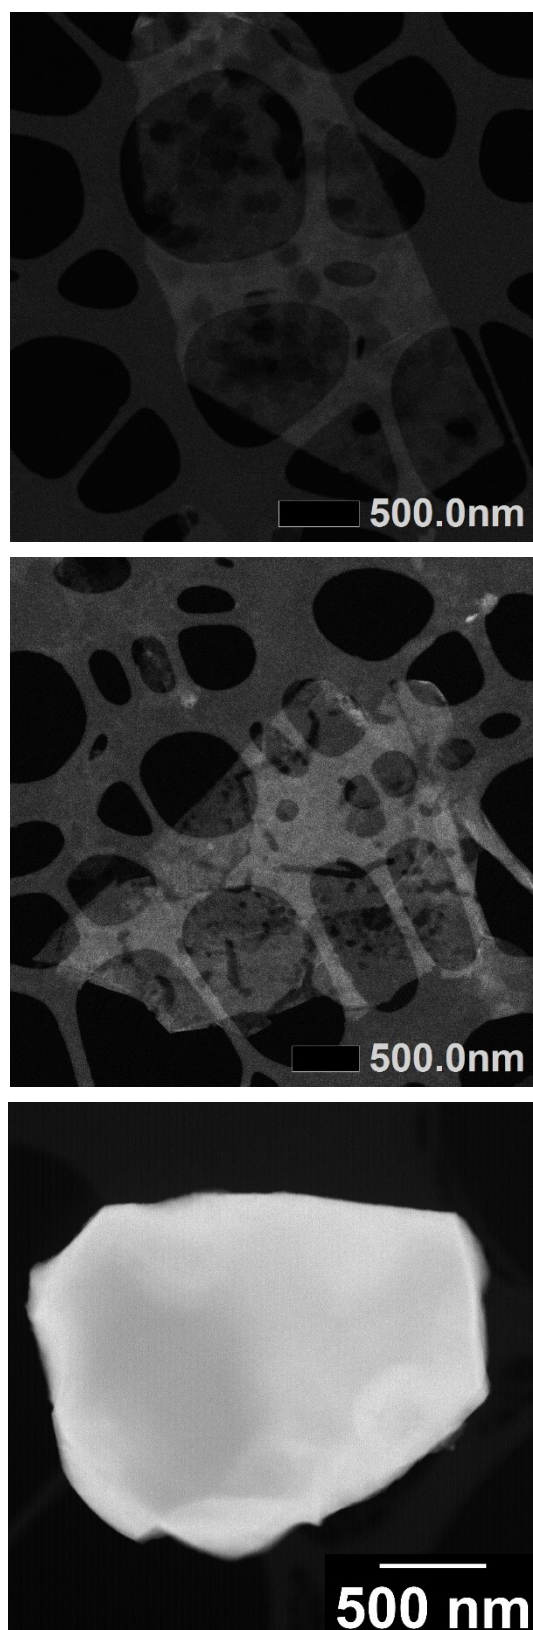

Figure S11 Scanning transmission electron microscopy images of DA-del-V<sub>2</sub>CT<sub>x</sub> (1) (top two images) analyzed directly from the suspension of delaminated V<sub>2</sub>CT<sub>x</sub> and DA-ml-V<sub>2</sub>CT<sub>x</sub> (bottom image) analyzed in the form of powder.

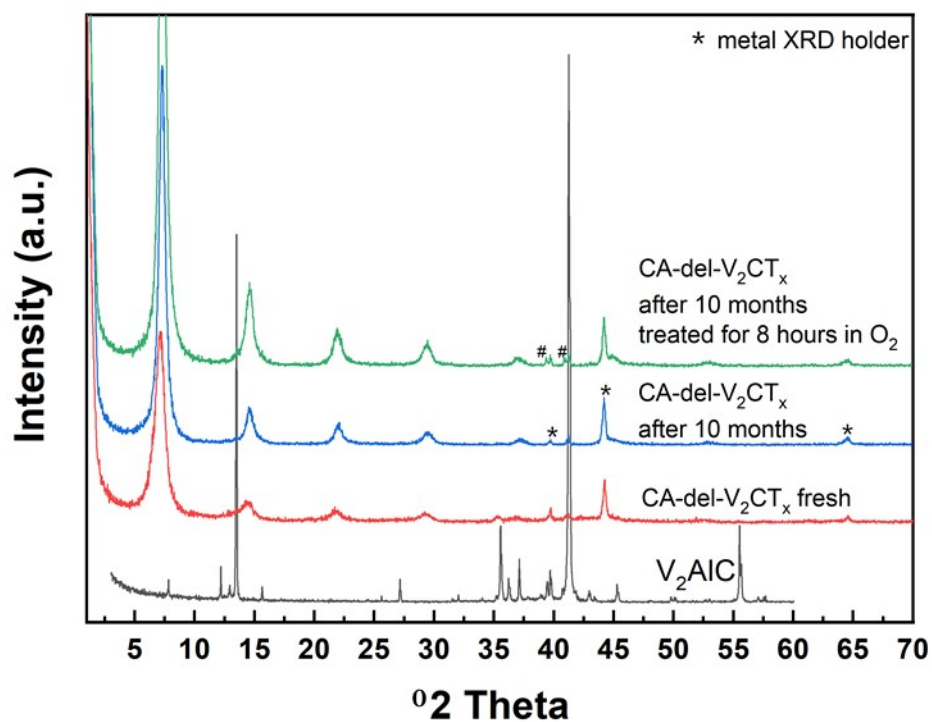

Fig S12: X-ray powder (PXRD) pattern of a parent  $V_2AlC$  MAX phase, freshly prepared CA-del- $V_2CT_x$  film, the same film after 10 months of storage in a desiccator, and the same old film after 8 hours of treatment with oxygen flow. Two peaks of the unknown phase are labeled with # and do not correspond to any  $V_2O_5$  or  $Al_2O_3$  phase.

Table S2 Fitting results of XPS spectra from all V<sub>2</sub>CT<sub>x</sub> materials prepared in this study.

| Region | Name             | DA-ml-V <sub>2</sub> CT <sub>x</sub> |           | DA-del-V <sub>2</sub> CT <sub>x</sub> (1) |           | DA-del-V <sub>2</sub> CT <sub>x</sub> (2) |           | CA-del-V <sub>2</sub> CT <sub>x</sub> |           | DA-del-4O <sub>2</sub> -V <sub>2</sub> CT <sub>x</sub> |           | DA-del-8O <sub>2</sub> -V <sub>2</sub> CT <sub>x</sub> |           | CA-del-8O <sub>2</sub> -V <sub>2</sub> CT <sub>x</sub> |           |
|--------|------------------|--------------------------------------|-----------|-------------------------------------------|-----------|-------------------------------------------|-----------|---------------------------------------|-----------|--------------------------------------------------------|-----------|--------------------------------------------------------|-----------|--------------------------------------------------------|-----------|
|        |                  | Position                             | At. Conc. | Position                                  | At. Conc. | Position                                  | At. Conc. | Position                              | At. Conc. | Position                                               | At. Conc. | Position                                               | At. Conc. | Position                                               | At. Conc. |
| F 1s   | V-F              | 684.68                               | 9.01      | 684.66                                    | 7.23      | 684.63                                    | 8.23      | 684.72                                | 10.49     | 684.49                                                 | 4.88      | 684.51                                                 | 5.37      | 684.51                                                 | 3.48      |
| V 2p   | V (+2)           | 513.48                               | 4.45      | 513.54                                    | 3.09      | 513.49                                    | 3.57      | 513.49                                | 4.34      | 513.41                                                 | 2.44      | 513.41                                                 | 2.50      | 513.41                                                 | 1.78      |
|        | V (+3)           | 514.62                               | 10.39     | 514.62                                    | 6.14      | 514.62                                    | 7.55      | 514.62                                | 9.05      | 514.62                                                 | 4.46      | 514.62                                                 | 4.34      | 514.62                                                 | 3.18      |
|        | V (+4)           | 516.40                               | 3.99      | 516.40                                    | 4.49      | 516.40                                    | 4.37      | 516.40                                | 4.40      | 516.40                                                 | 4.24      | 516.40                                                 | 4.53      | 516.40                                                 | 3.08      |
|        | V (+5)           | 517.80                               | 2.99      | 517.80                                    | 2.06      | 517.80                                    | 2.10      | 517.80                                | 2.25      | 517.80                                                 | 1.78      | 517.80                                                 | 1.89      | 517.80                                                 | 1.78      |
| O 1s   | O-V              | 529.68                               | 8.47      | 529.77                                    | 6.97      | 529.72                                    | 8.27      | 529.62                                | 6.81      | 529.79                                                 | 7.80      | 529.73                                                 | 6.14      | 529.79                                                 | 6.97      |
|        | H <sub>2</sub> O | 531.37                               | 10.94     | 531.39                                    | 12.14     | 531.30                                    | 7.39      | 531.06                                | 9.74      | 531.20                                                 | 10.35     | 531.20                                                 | 14.48     | 531.20                                                 | 8.99      |
|        | O-C/Si           | 532.88                               | 6.77      | 532.48                                    | 8.26      | 532.70                                    | 8.17      | 532.39                                | 5.49      | 532.35                                                 | 12.26     | 532.35                                                 | 8.34      | 532.35                                                 | 15.10     |
| C 1s   | C-C              | 284.84                               | 18.67     | 285.08                                    | 28.81     | 285.03                                    | 28.22     | 284.90                                | 24.98     | 285.05                                                 | 25.91     | 285.05                                                 | 24.98     | 285.01                                                 | 30.20     |
|        | V-C              | 282.00                               | 8.01      | 282.40                                    | 4.88      | 282.38                                    | 5.33      | 282.40                                | 5.80      | 282.21                                                 | 4.09      | 282.23                                                 | 4.02      | 282.25                                                 | 2.87      |
|        | C-O              | 286.31                               | 11.45     | 286.36                                    | 11.47     | 286.30                                    | 12.05     | 286.08                                | 13.69     | 286.30                                                 | 14.21     | 286.42                                                 | 15.83     | 286.30                                                 | 13.70     |
|        | C=O              | 288.45                               | 2.49      | 288.40                                    | 1.75      | 288.45                                    | 2.32      | 288.40                                | 0.14      | 288.17                                                 | 4.21      | 288.10                                                 | 4.33      | 287.98                                                 | 5.48      |

Table S3 Results of the analysis using the modified Curie-Weiss law.  $C$  ( $\text{m}^3\text{K}/\text{mol}$ ) – Curie constant,  $\theta_p$  – paramagnetic Curie temperature,  $\mu_{\text{eff}}$  – effective magnetic moment,  $\chi_0$  – Pauli susceptibility.

| Material                                        | $C$ ( $\text{m}^3\text{K}/\text{mol}$ ) | $\theta_p$ (K) | $\mu_{\text{eff}}$ ( $\mu_B$ ) | $\chi_0$ ( $\text{m}^3/\text{mol}$ ) |
|-------------------------------------------------|-----------------------------------------|----------------|--------------------------------|--------------------------------------|
| $\text{V}_2\text{AlC}$                          | $<1 \times 10^{-9}$                     | -              | -                              | $9.3 \times 10^{-8}$                 |
| DA-mI- $\text{V}_2\text{CT}_x$                  | $4.4 \times 10^{-6}$                    | 1.7            | 1.67                           | $2.5 \times 10^{-8}$                 |
| DA-del- $\text{V}_2\text{CT}_x$ (1)             | $4.8 \times 10^{-7}$                    | 0.9            | 0.55                           | $2.9 \times 10^{-8}$                 |
| CA-del- $\text{V}_2\text{CT}_x$                 | $4.9 \times 10^{-7}$                    | 0.9            | 0.56                           | $6.5 \times 10^{-9}$                 |
| DA-del- $4\text{O}_2$ - $\text{V}_2\text{CT}_x$ | $5.8 \times 10^{-7}$                    | 2.0            | 0.61                           | $5.5 \times 10^{-9}$                 |
| CA-del- $8\text{O}_2$ - $\text{V}_2\text{CT}_x$ | $5.8 \times 10^{-7}$                    | 1.6            | 0.61                           | $2.3 \times 10^{-9}$                 |

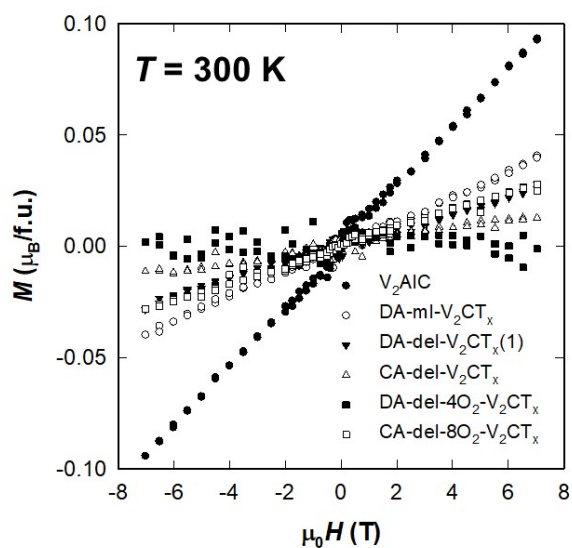

Figure S13 Magnetization isotherms recorded at 300 K.

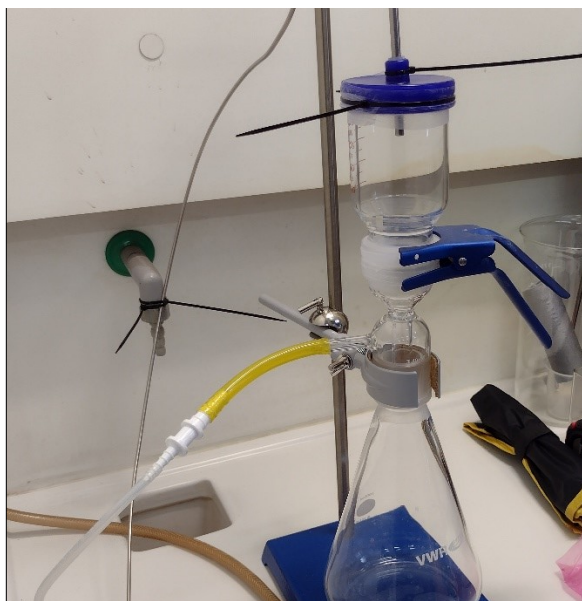

Fig.S14 Home-made apparatus for oxygen treatment involving filtration set with a solid frit bed. The flow was controlled at the output from the aperture.



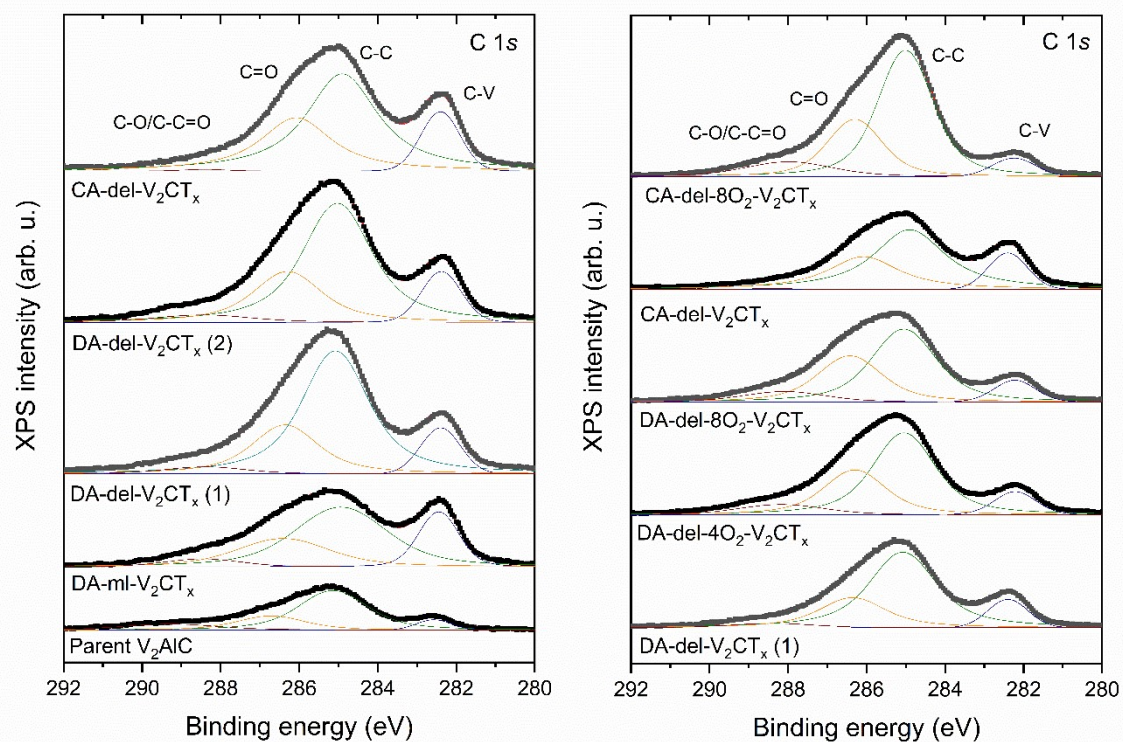

Fig.S15 XPS spectra of C 1s taken from parent  $V_2AlC$ , multilayered DA-ml- $V_2CT_x$ , and all delaminated films  $V_2CT_x$ . Complementary data to Figure 4 in the main text.

## Reference

1. Kresse, G. and J. Hafner, *Ab initio*. Physical Review B, 1993. **47**(1): p. 558-561.
2. Kresse, G. and D. Joubert, *From ultrasoft pseudopotentials to the projector augmented-wave method*. Physical Review B, 1999. **59**(3): p. 1758-1775.
3. Perdew, J.P., K. Burke, and M. Ernzerhof, *Generalized Gradient Approximation Made Simple*. Physical Review Letters, 1996. **77**(18): p. 3865-3868.
4. Grimme, S., et al., *A consistent and accurate ab initio parametrization of density functional dispersion correction (DFT-D) for the 94 elements H-Pu*. The Journal of Chemical Physics, 2010. **132**(15): p. 154104.
5. Dudarev, S.L., et al., *Electron-energy-loss spectra and the structural stability of nickel oxide: An LSDA+U study*. Physical Review B, 1998. **57**(3): p. 1505-1509.
6. He, J., P. Lyu, and P. Nachtigall, *New two-dimensional Mn-based MXenes with room-temperature ferromagnetism and half-metallicity*. Journal of Materials Chemistry C, 2016. **4**(47): p. 11143-11149.
7. Albuquerque, A.F., et al., *The ALPS project release 1.3: Open-source software for strongly correlated systems*. Journal of Magnetism and Magnetic Materials, 2007. **310**(2, Part 2): p. 1187-1193.
8. M. Shekhirev, C. E. Shuck, A. Sarycheva and Y. Gogotsi, *Progress in Materials Science*, 2021, **120**, 100757.
9. K. Matthews, T. Zhang, C. E. Shuck, A. VahidMohammadi and Y. Gogotsi, *Chem. Mat.*, 2022, **34**, 499-509.
10. S. Vorotilo, C. E. Shuck, M. Anayee, M. Shekhirev, K. Matthews, R. W. Lord, R. Wang, I. Roslyk, V. Balitskiy, V. Zahorodna, O. Gogotsi and Y. Gogotsi, *Graphene and 2D Materials*, 2023, DOI: 10.1007/s41127-023-00059-1.
